# Supplementary material for: Polymorphisms in M2+AlF5(H2O)7 (M2+ = Fe2+, Co2+, or Ni2+): Syntheses, Crystal Structures, and Characterization of New Mixed Metal Fluoride Hydrates
Source: MDPI journal article supplement (doi:10.3390/cryst14020197), 2024-02-17

## Supporting Information for:

### Polymorphisms in $M^{2+}AlF_5(H_2O)_7$ ( $M^{2+} = Fe^{2+}, Co^{2+},$ or $Ni^{2+}$ ): Syntheses, Crystal Structures, and Characterization of New Mixed Metal Fluoride Hydrates

Jun Min Seo <sup>1</sup>, Hongil Jo <sup>2</sup>, Myung Ho Choi <sup>2</sup>, Kang Min Ok <sup>2</sup>, Hong Young Chang <sup>3</sup> and Sun Woo Kim <sup>1,\*</sup>

<sup>1</sup> Department of Chemistry Education, Chosun University, Gwangju 61452, Republic of Korea; rn298@naver.com

<sup>2</sup> Department of Chemistry, Sogang University, Seoul 04107, Republic of Korea; hongil.jo@liverpool.ac.uk (H.J.); narciachoi@gmail.com (M.-H.C.); kmok@sogang.ac.kr (K.M.O.)

<sup>3</sup> Department of Computer, Mathematical and Physical Sciences (CMPS), Sul Ross State University, Alpine, TX 79832, USA; hong.young.chang@sulross.edu

\* Correspondence: swookim@chosun.ac.kr

Table S1. Atomic coordinates and equivalent isotropic displacement parameters ( $\text{\AA}^2$ ) for  $M^{2+}AlF_5(H_2O)_7$  ( $M^{2+} = Fe^{2+}, Co^{2+},$  or  $Ni^{2+}$ ) at RT.

Table S2. Atomic coordinates and equivalent isotropic displacement parameters ( $\text{\AA}^2$ ) for  $M^{2+}AlF_5(H_2O)_7$  ( $M^{2+} = Fe^{2+}, Co^{2+},$  or  $Ni^{2+}$ ) at 100 K.

Table S3. Bond valence calculation for  $M^{2+}AlF_5(H_2O)_7$  ( $M^{2+} = Fe^{2+}, Co^{2+},$  or  $Ni^{2+}$ ) at RT and 100 K, respectively.

Table S4. Out-of-center distortion of octahedral structures in  $[Fe(H_2O)_6]^{2+}$  at RT and 100 K temperature.

Figure S1. Experimental and Calculated X-ray powder diffraction patterns for  $M^{2+}AlF_5(H_2O)_7$  ( $M^{2+} = Fe^{2+}, Co^{2+},$  or  $Ni^{2+}$ ): (a)  $FeAlF_5(H_2O)_7$ , (b)  $CoAlF_5(H_2O)_7$  and (c)  $NiAlF_5(H_2O)_7$ .

Figure S2. ORTEP representation (50% probability ellipsoid) for  $M^{2+}AlF_5(H_2O)_7$  ( $M^{2+} = Fe^{2+}, Co^{2+},$  or  $Ni^{2+}$ ).

Figure S3. FT-IR Spectra of  $M^{2+}AlF_5(H_2O)_7$  ( $M^{2+} = Fe^{2+}, Co^{2+},$  or  $Ni^{2+}$ ): (a)  $FeAlF_5(H_2O)_7$ , (b)  $CoAlF_5(H_2O)_7$  and (c)  $NiAlF_5(H_2O)_7$ .

Figure S4. Powder X-ray diffraction pattern for final residuals after TGA experiment: (a)  $FeAlF_5(H_2O)_7$ , (b)  $CoAlF_5(H_2O)_7$  and (c)  $NiAlF_5(H_2O)_7$ .

**Table S1. Atomic coordinates and equivalent isotropic displacement parameters ( $\text{\AA}^2$ ) for  $M^{2+}\text{AlF}_5(\text{H}_2\text{O})_7$  ( $M^{2+} = \text{Fe}^{2+}$ ,  $\text{Co}^{2+}$ , or  $\text{Ni}^{2+}$ ) at RT.**

| <b><math>\text{FeAlF}_5(\text{H}_2\text{O})_7</math></b> |     |           |             |            |                                      |
|----------------------------------------------------------|-----|-----------|-------------|------------|--------------------------------------|
| atom                                                     | sof | x         | y           | z          | $U_{(\text{iso})}^*/U_{(\text{eq})}$ |
| Fe(1)                                                    | 1   | 0.5       | 0.5         | 0.5        | 0.0160(3)                            |
| Fe(2)                                                    | 1   | 0.5       | 0           | 0.5        | 0.0159(3)                            |
| Al(1)                                                    | 1   | 0.25      | 0.25        | 0          | 0.0136(3)                            |
| O(1)                                                     | 0.5 | 0.3789(3) | 0.3260(3)   | -0.0670(5) | 0.0625(11)                           |
| H(1A)                                                    | 0.5 | 0.464(4)  | 0.324(8)    | -0.004(17) | 0.094*                               |
| H(1B)                                                    | 0.5 | 0.374(10) | 0.344(10)   | -0.208(6)  | 0.094*                               |
| O(2)                                                     | 1   | 0.5       | 0.3484(3)   | 0.5        | 0.0524(15)                           |
| H(2)                                                     | 1   | 0.446(4)  | 0.310(3)    | 0.409(6)   | 0.058(16)*                           |
| O(3)                                                     | 1   | 0.3670(4) | 0.5         | 0.2236(6)  | 0.0291(9)                            |
| H(3)                                                     | 1   | 0.331(4)  | 0.4451(12)  | 0.157(6)   | 0.044*                               |
| O(4)                                                     | 1   | 0.3575(4) | 0.5         | 0.6842(6)  | 0.0367(10)                           |
| H(4)                                                     | 1   | 0.353(5)  | 0.5560(13)  | 0.763(6)   | 0.055*                               |
| O(5)                                                     | 1   | 0.5758(4) | 0           | 0.8170(6)  | 0.0308(9)                            |
| H(5)                                                     | 1   | 0.603(4)  | 0.0545(13)  | 0.899(5)   | 0.046*                               |
| O(6)                                                     | 1   | 0.3667(3) | 0.1054(2)   | 0.5494(4)  | 0.0301(7)                            |
| H(6A)                                                    | 1   | 0.361(4)  | 0.125(3)    | 0.684(4)   | 0.045*                               |
| H(6B)                                                    | 1   | 0.352(4)  | 0.159(2)    | 0.461(5)   | 0.045*                               |
| F(1)                                                     | 0.5 | 0.3789(3) | 0.3260(3)   | -0.0670(5) | 0.0625(11)                           |
| F(2)                                                     | 1   | 0.3219(3) | 0.1412(2)   | -0.0669(4) | 0.0534(8)                            |
| F(3)                                                     | 1   | 0.3297(2) | 0.24131(17) | 0.2634(3)  | 0.0340(6)                            |

$U_{(\text{eq})}$  is defined as one-third of the trace of the orthogonalized  $U^{\text{ij}}$  tensor.

| <b>CoAlF<sub>5</sub>(H<sub>2</sub>O)<sub>7</sub></b> |     |           |             |            |                                                    |
|------------------------------------------------------|-----|-----------|-------------|------------|----------------------------------------------------|
| atom                                                 | sof | x         | y           | z          | U <sub>(iso)</sub> <sup>*</sup> /U <sub>(eq)</sub> |
| Co(1)                                                | 1   | 0.5       | 0.5         | 0.5        | 0.0161(3)                                          |
| Co(2)                                                | 1   | 0.5       | 0           | 0.5        | 0.0161(3)                                          |
| Al(1)                                                | 1   | 0.25      | 0.25        | 0          | 0.0170(3)                                          |
| O(1)                                                 | 0.5 | 0.3778(3) | 0.3268(3)   | -0.0684(5) | 0.0661(11)                                         |
| H(1A)                                                | 0.5 | 0.462(4)  | 0.318(9)    | 0.000(17)  | 0.099 <sup>*</sup>                                 |
| H(1B)                                                | 0.5 | 0.381(10) | 0.352(9)    | -0.203(9)  | 0.099 <sup>*</sup>                                 |
| O(2)                                                 | 1   | 0.5       | 0.3516(3)   | 0.5        | 0.0521(13)                                         |
| H(2)                                                 | 1   | 0.445(3)  | 0.313(2)    | 0.410(5)   | 0.050(14) <sup>*</sup>                             |
| O(3)                                                 | 1   | 0.3675(3) | 0.5         | 0.2250(6)  | 0.0296(8)                                          |
| H(3)                                                 | 1   | 0.329(3)  | 0.4445(12)  | 0.166(6)   | 0.044 <sup>*</sup>                                 |
| O(4)                                                 | 1   | 0.3572(3) | 0.5         | 0.6809(6)  | 0.0375(10)                                         |
| H(4)                                                 | 1   | 0.347(5)  | 0.5557(13)  | 0.763(6)   | 0.056 <sup>*</sup>                                 |
| O(5)                                                 | 1   | 0.5751(4) | 0           | 0.8141(5)  | 0.0313(8)                                          |
| H(5)                                                 | 1   | 0.597(4)  | 0.0549(12)  | 0.899(5)   | 0.047 <sup>*</sup>                                 |
| O(6)                                                 | 1   | 0.3710(3) | 0.10547(19) | 0.5511(4)  | 0.0303(6)                                          |
| H(6A)                                                | 1   | 0.368(4)  | 0.127(3)    | 0.686(3)   | 0.045 <sup>*</sup>                                 |
| H(6B)                                                | 1   | 0.355(4)  | 0.159(2)    | 0.464(5)   | 0.045 <sup>*</sup>                                 |
| F(1)                                                 | 0.5 | 0.3778(3) | 0.3268(3)   | -0.0684(5) | 0.0661(11)                                         |
| F(2)                                                 | 1   | 0.3238(3) | 0.1418(2)   | -0.0645(4) | 0.0588(9)                                          |
| F(3)                                                 | 1   | 0.3306(2) | 0.24300(15) | 0.2649(3)  | 0.0351(6)                                          |

U<sub>(eq)</sub> is defined as one third of the trace of the orthogonalized U<sup>ij</sup> tensor.

| <b>NiAlF<sub>5</sub>(H<sub>2</sub>O)<sub>7</sub></b> |     |           |             |            |                                                    |
|------------------------------------------------------|-----|-----------|-------------|------------|----------------------------------------------------|
| atom                                                 | sof | x         | y           | z          | U <sub>(iso)</sub> <sup>*</sup> /U <sub>(eq)</sub> |
| Ni(1)                                                | 1   | 0.5       | 0.5         | 0.5        | 0.0146(2)                                          |
| Ni(2)                                                | 1   | 0.5       | 0           | 0.5        | 0.0148(2)                                          |
| Al(1)                                                | 1   | 0.25      | 0.25        | 0          | 0.0152(3)                                          |
| O(1)                                                 | 0.5 | 0.3783(3) | 0.3274(3)   | -0.0694(6) | 0.0730(13)                                         |
| H(1A)                                                | 0.5 | 0.319(9)  | 0.374(8)    | -0.05(2)   | 0.109 <sup>*</sup>                                 |
| H(1B)                                                | 0.5 | 0.458(5)  | 0.337(9)    | 0.01(2)    | 0.109 <sup>*</sup>                                 |
| O(2)                                                 | 1   | 0.5       | 0.3526(3)   | 0.5        | 0.0452(13)                                         |
| H(2)                                                 | 1   | 0.443(3)  | 0.315(3)    | 0.411(6)   | 0.056(16) <sup>*</sup>                             |
| O(3)                                                 | 1   | 0.3709(4) | 0.5         | 0.2288(6)  | 0.0270(8)                                          |
| H(3)                                                 | 1   | 0.336(4)  | 0.4449(12)  | 0.161(6)   | 0.041 <sup>*</sup>                                 |
| O(4)                                                 | 1   | 0.3576(3) | 0.5         | 0.6791(6)  | 0.0299(9)                                          |
| H(4)                                                 | 1   | 0.358(5)  | 0.5560(13)  | 0.764(5)   | 0.045 <sup>*</sup>                                 |
| O(5)                                                 | 1   | 0.5728(4) | 0           | 0.8108(6)  | 0.0294(9)                                          |
| H(5)                                                 | 1   | 0.598(4)  | 0.0553(13)  | 0.891(5)   | 0.044 <sup>*</sup>                                 |
| O(6)                                                 | 1   | 0.3704(3) | 0.1037(2)   | 0.5495(4)  | 0.0278(6)                                          |
| H(6A)                                                | 1   | 0.369(4)  | 0.126(3)    | 0.685(4)   | 0.042 <sup>*</sup>                                 |
| H(6B)                                                | 1   | 0.356(4)  | 0.158(2)    | 0.460(5)   | 0.042 <sup>*</sup>                                 |
| F(1)                                                 | 0.5 | 0.3783(3) | 0.3274(3)   | -0.0694(6) | 0.0730(13)                                         |
| F(2)                                                 | 1   | 0.3258(4) | 0.1418(2)   | -0.0634(4) | 0.0670(11)                                         |
| F(3)                                                 | 1   | 0.3299(2) | 0.24329(17) | 0.2659(3)  | 0.0344(6)                                          |

U<sub>(eq)</sub> is defined as one third of the trace of the orthogonalized U<sup>ij</sup> tensor.

**Table S2.** Atomic coordinates and equivalent isotropic displacement parameters ( $\text{\AA}^2$ ) for  $M^{2+}\text{AlF}_5(\text{H}_2\text{O})_7$  ( $M^{2+} = \text{Fe}^{2+}$ ,  $\text{Co}^{2+}$ , or  $\text{Ni}^{2+}$ ) at 100 K.

| <b><math>\text{FeAlF}_5(\text{H}_2\text{O})_7</math></b> |     |            |            |           |                                      |
|----------------------------------------------------------|-----|------------|------------|-----------|--------------------------------------|
| atom                                                     | sof | x          | y          | z         | $U_{(\text{iso})}^*/U_{(\text{eq})}$ |
| Fe(1)                                                    | 1   | 0.5        | 0.5        | 0.5       | 0.0108(2)                            |
| Fe(2)                                                    | 1   | 0.5        | 0          | 1         | 0.0105(2)                            |
| Al(1)                                                    | 1   | 0          | 0          | 0.5       | 0.0093(4)                            |
| Al(2)                                                    | 1   | 1          | 0.5        | 1         | 0.0082(4)                            |
| O(1)                                                     | 0.5 | -0.0391(6) | 0.2182(5)  | 0.5276(6) | 0.0310(11)                           |
| H(1A)                                                    | 0.5 | 0.032(18)  | 0.282(17)  | 0.626(10) | 0.047*                               |
| H(1B)                                                    | 0.5 | -0.180(8)  | 0.239(18)  | 0.525(16) | 0.047*                               |
| O(2)                                                     | 0.5 | 0.8985(6)  | 0.5732(5)  | 1.1921(4) | 0.0200(8)                            |
| H(2A)                                                    | 0.5 | 0.819(19)  | 0.507(13)  | 1.243(13) | 0.03*                                |
| H(2B)                                                    | 0.5 | 0.97(2)    | 0.658(11)  | 1.276(10) | 0.03*                                |
| O(3)                                                     | 1   | 0.5308(8)  | 0.3243(5)  | 0.6254(5) | 0.0292(12)                           |
| H(3A)                                                    | 1   | 0.454(11)  | 0.398(6)   | 0.686(9)  | 0.044*                               |
| H(3B)                                                    | 1   | 0.449(10)  | 0.225(4)   | 0.619(9)  | 0.044*                               |
| O(4)                                                     | 1   | 0.2201(5)  | 0.3721(5)  | 0.3692(5) | 0.0172(7)                            |
| H(4A)                                                    | 1   | 0.115(7)   | 0.324(8)   | 0.414(7)  | 0.026*                               |
| H(4B)                                                    | 1   | 0.164(9)   | 0.381(8)   | 0.268(4)  | 0.026*                               |
| O(5)                                                     | 1   | 0.3122(6)  | 0.6270(5)  | 0.6596(5) | 0.0210(9)                            |
| H(5A)                                                    | 1   | 0.255(11)  | 0.709(6)   | 0.623(7)  | 0.032*                               |
| H(5B)                                                    | 1   | 0.392(10)  | 0.669(7)   | 0.760(4)  | 0.032*                               |
| O(6)                                                     | 1   | 0.1827(5)  | -0.0693(5) | 0.9190(5) | 0.0173(8)                            |
| H(6A)                                                    | 1   | 0.108(9)   | -0.021(7)  | 0.849(7)  | 0.026*                               |
| H(6B)                                                    | 1   | 0.091(8)   | -0.148(6)  | 0.941(8)  | 0.026*                               |
| O(7)                                                     | 1   | 0.5542(6)  | -0.0354(5) | 0.7631(5) | 0.0184(9)                            |

|       |     |            |            |           |            |
|-------|-----|------------|------------|-----------|------------|
| H(7A) | 1   | 0.462(8)   | 0.004(9)   | 0.697(7)  | 0.028*     |
| H(7B) | 1   | 0.687(5)   | -0.020(9)  | 0.732(8)  | 0.028*     |
| O(8)  | 1   | 0.4577(7)  | 0.2447(5)  | 1.0255(5) | 0.0185(9)  |
| H(8A) | 1   | 0.331(6)   | 0.284(8)   | 1.000(8)  | 0.028*     |
| H(8B) | 1   | 0.561(7)   | 0.308(7)   | 0.992(8)  | 0.028*     |
| F(1)  | 0.5 | -0.0391(6) | 0.2182(5)  | 0.5276(6) | 0.0310(11) |
| F(2)  | 0.5 | 0.8985(6)  | 0.5732(5)  | 1.1921(4) | 0.0200(8)  |
| F(3)  | 1   | 0.0565(6)  | -0.0056(6) | 0.3066(4) | 0.0326(10) |
| F(4)  | 1   | 0.2721(5)  | 0.0568(4)  | 0.5744(4) | 0.0166(7)  |
| F(5)  | 1   | 0.7450(5)  | 0.3992(4)  | 0.9127(4) | 0.0169(7)  |
| F(6)  | 1   | 0.9310(5)  | 0.6755(4)  | 0.9406(4) | 0.0166(7)  |

$U_{\text{(eq)}}$  is defined as one third of the trace of the orthogonalized  $U^{\text{ij}}$  tensor.

| <b>CoAlF<sub>5</sub>(H<sub>2</sub>O)<sub>7</sub></b> |     |            |           |           |                                      |
|------------------------------------------------------|-----|------------|-----------|-----------|--------------------------------------|
| atom                                                 | sof | x          | y         | z         | $U_{\text{(iso)}}^*/U_{\text{(eq)}}$ |
| Co(1)                                                | 1   | 0.5        | 0.5       | 0.5       | 0.00844(17)                          |
| Co(2)                                                | 1   | 0.5        | 0         | 1         | 0.00797(17)                          |
| Al(1)                                                | 1   | 0          | 0         | 0.5       | 0.0107(3)                            |
| Al(2)                                                | 1   | 1          | 0.5       | 1         | 0.0096(3)                            |
| O(1)                                                 | 0.5 | -0.0407(4) | 0.2184(3) | 0.5335(4) | 0.0273(7)                            |
| H(1A)                                                | 0.5 | 0.039(11)  | 0.288(10) | 0.627(7)  | 0.041*                               |
| H(1B)                                                | 0.5 | -0.183(5)  | 0.216(12) | 0.552(10) | 0.041*                               |
| O(2)                                                 | 0.5 | 0.8938(4)  | 0.5718(3) | 1.1895(3) | 0.0193(6)                            |
| H(2A)                                                | 0.5 | 0.835(14)  | 0.498(7)  | 1.242(9)  | 0.029*                               |
| H(2B)                                                | 0.5 | 0.893(15)  | 0.675(4)  | 1.259(8)  | 0.029*                               |
| O(3)                                                 | 1   | 0.5275(5)  | 0.3286(4) | 0.6242(4) | 0.0293(8)                            |

|       |     |            |            |           |           |
|-------|-----|------------|------------|-----------|-----------|
| H(3A) | 1   | 0.586(8)   | 0.351(6)   | 0.730(3)  | 0.044*    |
| H(3B) | 1   | 0.443(7)   | 0.229(4)   | 0.604(6)  | 0.044*    |
| O(4)  | 1   | 0.2194(4)  | 0.3727(3)  | 0.3695(3) | 0.0159(6) |
| H(4A) | 1   | 0.118(6)   | 0.321(5)   | 0.415(5)  | 0.024*    |
| H(4B) | 1   | 0.156(6)   | 0.367(5)   | 0.268(3)  | 0.024*    |
| O(5)  | 1   | 0.3207(4)  | 0.6267(3)  | 0.6607(3) | 0.0229(7) |
| H(5A) | 1   | 0.244(7)   | 0.674(5)   | 0.592(5)  | 0.034*    |
| H(5B) | 1   | 0.389(7)   | 0.698(5)   | 0.751(4)  | 0.034*    |
| O(6)  | 1   | 0.1849(4)  | -0.0697(3) | 0.9223(3) | 0.0164(6) |
| H(6A) | 1   | 0.110(6)   | -0.033(5)  | 0.845(4)  | 0.025*    |
| H(6B) | 1   | 0.105(6)   | -0.155(4)  | 0.944(5)  | 0.025*    |
| O(7)  | 1   | 0.5542(4)  | -0.0356(3) | 0.7662(3) | 0.0160(6) |
| H(7A) | 1   | 0.460(5)   | 0.008(5)   | 0.704(5)  | 0.024*    |
| H(7B) | 1   | 0.686(4)   | -0.036(5)  | 0.735(5)  | 0.024*    |
| O(8)  | 1   | 0.4546(4)  | 0.2384(3)  | 1.0174(3) | 0.0173(6) |
| H(8A) | 1   | 0.323(4)   | 0.275(5)   | 1.013(5)  | 0.026*    |
| H(8B) | 1   | 0.549(5)   | 0.300(5)   | 0.976(5)  | 0.026*    |
| F(1)  | 0.5 | -0.0407(4) | 0.2184(3)  | 0.5335(4) | 0.0273(7) |
| F(2)  | 0.5 | 0.8938(4)  | 0.5718(3)  | 1.1895(3) | 0.0193(6) |
| F(3)  | 1   | 0.0555(4)  | 0.0003(4)  | 0.3072(3) | 0.0280(6) |
| F(4)  | 1   | 0.2734(3)  | 0.0591(3)  | 0.5748(3) | 0.0158(5) |
| F(5)  | 1   | 0.7447(3)  | 0.3977(3)  | 0.9098(3) | 0.0161(5) |
| F(6)  | 1   | 0.9308(3)  | 0.6758(3)  | 0.9408(3) | 0.0153(5) |

---

$U_{\text{(eq)}}$  is defined as one third of the trace of the orthogonalized  $U^{\text{ij}}$  tensor.

| <b>NiAlF<sub>5</sub>(H<sub>2</sub>O)<sub>7</sub></b> |     |            |            |           |                                                    |
|------------------------------------------------------|-----|------------|------------|-----------|----------------------------------------------------|
| atom                                                 | sof | x          | y          | z         | U <sub>(iso)</sub> <sup>*</sup> /U <sub>(eq)</sub> |
| Ni(1)                                                | 1   | 0.5        | 0.5        | 0.5       | 0.0078(3)                                          |
| Ni(2)                                                | 1   | 0.5        | 0          | 1         | 0.0074(3)                                          |
| Al(1)                                                | 1   | 0          | 0          | 0.5       | 0.0096(5)                                          |
| Al(2)                                                | 1   | 1          | 0.5        | 1         | 0.0090(5)                                          |
| O(1)                                                 | 0.5 | -0.0374(6) | 0.2204(5)  | 0.5313(6) | 0.0272(11)                                         |
| H(1A)                                                | 0.5 | -0.138(18) | 0.20(2)    | 0.596(17) | 0.041 <sup>*</sup>                                 |
| H(1B)                                                | 0.5 | -0.10(2)   | 0.282(19)  | 0.466(16) | 0.041 <sup>*</sup>                                 |
| O(2)                                                 | 0.5 | 0.8861(6)  | 0.5748(5)  | 1.1875(5) | 0.0162(8)                                          |
| H(2A)                                                | 0.5 | 0.88(2)    | 0.487(9)   | 1.236(13) | 0.024 <sup>*</sup>                                 |
| H(2B)                                                | 0.5 | 0.93(2)    | 0.666(9)   | 1.276(9)  | 0.024 <sup>*</sup>                                 |
| O(3)                                                 | 1   | 0.5355(7)  | 0.3246(5)  | 0.6178(5) | 0.0205(10)                                         |
| H(3A)                                                | 1   | 0.456(10)  | 0.386(7)   | 0.691(8)  | 0.031 <sup>*</sup>                                 |
| H(3B)                                                | 1   | 0.453(10)  | 0.221(4)   | 0.590(9)  | 0.031 <sup>*</sup>                                 |
| O(4)                                                 | 1   | 0.2212(6)  | 0.3793(5)  | 0.3734(5) | 0.0135(9)                                          |
| H(4A)                                                | 1   | 0.119(9)   | 0.322(7)   | 0.416(7)  | 0.02 <sup>*</sup>                                  |
| H(4B)                                                | 1   | 0.191(10)  | 0.338(8)   | 0.262(2)  | 0.02 <sup>*</sup>                                  |
| O(5)                                                 | 1   | 0.3220(6)  | 0.6250(5)  | 0.6603(5) | 0.0175(9)                                          |
| H(5A)                                                | 1   | 0.224(9)   | 0.697(7)   | 0.641(8)  | 0.026 <sup>*</sup>                                 |
| H(5B)                                                | 1   | 0.418(9)   | 0.687(7)   | 0.748(6)  | 0.026 <sup>*</sup>                                 |
| O(6)                                                 | 1   | 0.1886(6)  | -0.0665(5) | 0.9246(5) | 0.0150(9)                                          |
| H(6A)                                                | 1   | 0.116(9)   | -0.013(7)  | 0.857(7)  | 0.023 <sup>*</sup>                                 |
| H(6B)                                                | 1   | 0.097(9)   | -0.150(6)  | 0.942(8)  | 0.023 <sup>*</sup>                                 |
| O(7)                                                 | 1   | 0.5540(6)  | -0.0391(5) | 0.7678(5) | 0.0135(9)                                          |
| H(7A)                                                | 1   | 0.458(8)   | -0.004(9)  | 0.698(6)  | 0.02 <sup>*</sup>                                  |



|       |     |            |            |           |            |
|-------|-----|------------|------------|-----------|------------|
| H(7B) | 1   | 0.677(7)   | -0.062(9)  | 0.722(7)  | 0.02*      |
| O(8)  | 1   | 0.4580(7)  | 0.2388(5)  | 1.0191(5) | 0.0147(9)  |
| H(8A) | 1   | 0.330(6)   | 0.283(8)   | 1.029(9)  | 0.022*     |
| H(8B) | 1   | 0.549(8)   | 0.301(7)   | 0.975(8)  | 0.022*     |
| F(1)  | 0.5 | -0.0374(6) | 0.2204(5)  | 0.5313(6) | 0.0272(11) |
| F(2)  | 0.5 | 0.8861(6)  | 0.5748(5)  | 1.1875(5) | 0.0162(8)  |
| F(3)  | 1   | 0.0554(6)  | -0.0041(6) | 0.3034(4) | 0.0262(9)  |
| F(4)  | 1   | 0.2755(5)  | 0.0568(4)  | 0.5732(4) | 0.0139(7)  |
| F(5)  | 1   | 0.7461(5)  | 0.3959(4)  | 0.9065(4) | 0.0133(7)  |
| F(6)  | 1   | 0.9318(5)  | 0.6765(4)  | 0.9379(4) | 0.0133(7)  |

$U_{\text{(eq)}}$  is defined as one third of the trace of the orthogonalized  $U^{\text{ij}}$  tensor.

**Table S3. Bond valence calculation for  $M^{2+}\text{AlF}_5(\text{H}_2\text{O})_7$  ( $M^{2+} = \text{Fe}^{2+}$ ,  $\text{Co}^{2+}$ , or  $\text{Ni}^{2+}$ ) at RT and 100 K, respectively.**

| <b>FeAlF<sub>5</sub>(H<sub>2</sub>O)<sub>7</sub> at RT</b> |       |                       |                       |                       |                       |                       |       |                       |                       |                           |
|------------------------------------------------------------|-------|-----------------------|-----------------------|-----------------------|-----------------------|-----------------------|-------|-----------------------|-----------------------|---------------------------|
| Atoms                                                      | O(1)  | O(2)                  | O(3)                  | O(4)                  | O(5)                  | O(6)                  | F(1)  | F(2)                  | F(3)                  | $\Sigma_{\text{cations}}$ |
| Fe(1)                                                      |       | 0.358 <sup>[x2]</sup> | 0.347 <sup>[x2]</sup> | 0.327 <sup>[x2]</sup> |                       |                       |       |                       |                       | <b>2.06</b>               |
| Fe(2)                                                      |       |                       |                       |                       | 0.364 <sup>[x2]</sup> | 0.330 <sup>[x4]</sup> |       |                       |                       | <b>2.05</b>               |
| Al(1)                                                      | 0.558 |                       |                       |                       |                       |                       | 0.419 | 0.524 <sup>[x2]</sup> | 0.520 <sup>[x2]</sup> | <b>3.06</b>               |
| H(1A)                                                      | 0.653 |                       |                       |                       |                       |                       | 0.326 |                       |                       | <b>0.98</b>               |
| H(1B)                                                      | 0.658 | <sup>[x2]</sup> 0.009 |                       | <sup>[x2]</sup> 0.018 |                       |                       | 0.327 |                       |                       | <b>1.01</b>               |
| H(2)                                                       |       | <sup>[x2]</sup> 0.693 |                       |                       |                       |                       |       |                       | 0.160                 | <b>0.85</b>               |
| H(3)                                                       | 0.016 |                       | <sup>[x2]</sup> 0.693 |                       |                       |                       | 0.006 | 0.090                 |                       | <b>0.81</b>               |
| H(4)                                                       | 0.042 |                       |                       | <sup>[x2]</sup> 0.677 |                       |                       | 0.017 |                       |                       | <b>0.74</b>               |
| H(5)                                                       |       |                       |                       |                       | <sup>[x2]</sup> 0.667 |                       |       | 0.160                 |                       | <b>0.83</b>               |
| H(6A)                                                      |       |                       |                       |                       |                       | 0.683                 |       | 0.152                 | 0.168                 | <b>1.00</b>               |
| H(6B)                                                      |       |                       |                       |                       |                       | 0.677                 |       |                       |                       | <b>0.68</b>               |

|                          |             |             |             |             |             |             |             |             |             |  |
|--------------------------|-------------|-------------|-------------|-------------|-------------|-------------|-------------|-------------|-------------|--|
| $\Sigma_{\text{anions}}$ | <b>1.87</b> | <b>1.76</b> | <b>1.73</b> | <b>1.72</b> | <b>1.70</b> | <b>1.69</b> | <b>1.09</b> | <b>0.93</b> | <b>0.85</b> |  |
|--------------------------|-------------|-------------|-------------|-------------|-------------|-------------|-------------|-------------|-------------|--|

<sup>a</sup> Bond valences sums calculated with the formula:  $S_i = \exp[(R_0 - R_i)/B]$ , where  $S_i$  = valence of bond “ $i$ ”,  $R_0$  is a constant dependent on the bonded elements,  $R_i$  is the bond length of bond  $i$  and  $B=0.37$  or  $0.558$  (H-F only). Left and right superscripts indicate the # of equivalent bonds for anions and cations, respectively.

| <b>CoAlF<sub>5</sub>(H<sub>2</sub>O)<sub>7</sub> at RT</b> |             |                       |                       |                       |                       |                       |             |                       |                       |                           |
|------------------------------------------------------------|-------------|-----------------------|-----------------------|-----------------------|-----------------------|-----------------------|-------------|-----------------------|-----------------------|---------------------------|
| Atoms                                                      | O(1)        | O(2)                  | O(3)                  | O(4)                  | O(5)                  | O(6)                  | F(1)        | F(2)                  | F(3)                  | $\Sigma_{\text{cations}}$ |
| Co(1)                                                      |             | 0.378 <sup>[x2]</sup> | 0.343 <sup>[x2]</sup> | 0.318 <sup>[x2]</sup> |                       |                       |             |                       |                       | <b>2.08</b>               |
| Co(2)                                                      |             |                       |                       |                       | 0.368 <sup>[x2]</sup> | 0.336 <sup>[x4]</sup> |             |                       |                       | <b>2.08</b>               |
| Al(1)                                                      | 0.564       |                       |                       |                       |                       |                       | 0.423       | 0.531 <sup>[x2]</sup> | 0.521 <sup>[x2]</sup> | <b>3.09</b>               |
| H(1A)                                                      | 0.655       |                       |                       |                       |                       |                       | 0.326       |                       |                       | <b>0.98</b>               |
| H(1B)                                                      | 0.648       | <sup>[x2]</sup> 0.009 |                       | <sup>[x2]</sup> 0.024 |                       |                       | 0.324       |                       |                       | <b>1.00</b>               |
| H(2)                                                       |             | <sup>[x2]</sup> 0.694 |                       |                       |                       |                       |             |                       | 0.164                 | <b>0.86</b>               |
| H(3)                                                       | 0.015       |                       | <sup>[x2]</sup> 0.701 |                       |                       |                       | 0.006       | 0.090                 |                       | <b>0.81</b>               |
| H(4)                                                       | 0.044       |                       |                       | <sup>[x2]</sup> 0.645 |                       |                       | 0.017       |                       |                       | <b>0.71</b>               |
| H(5)                                                       |             |                       |                       |                       | <sup>[x2]</sup> 0.665 |                       |             | 0.160                 |                       | <b>0.83</b>               |
| H(6A)                                                      |             |                       |                       |                       |                       | 0.691                 |             | 0.146                 |                       | <b>0.84</b>               |
| H(6B)                                                      |             |                       |                       |                       |                       | 0.684                 |             |                       | 0.164                 | <b>0.85</b>               |
| $\Sigma_{\text{anions}}$                                   | <b>1.93</b> | <b>1.78</b>           | <b>1.75</b>           | <b>1.66</b>           | <b>1.70</b>           | <b>1.71</b>           | <b>1.07</b> | <b>0.93</b>           | <b>0.85</b>           |                           |

<sup>a</sup> Bond valences sum calculated with the formula:  $S_i = \exp[(R_0 - R_i)/B]$ , where  $S_i$  = valence of bond “ $i$ ”,  $R_0$  is a constant dependent on the bonded elements,  $R_i$  is the bond length of bond  $i$  and  $B=0.37$  or  $0.558$  (H-F only). Left and right superscripts indicate the # of equivalent bonds for anions and cations, respectively.

| <b>NiAlF<sub>5</sub>(H<sub>2</sub>O)<sub>7</sub> at RT</b> |             |                       |                       |                       |                       |                       |             |                       |                       |                           |
|------------------------------------------------------------|-------------|-----------------------|-----------------------|-----------------------|-----------------------|-----------------------|-------------|-----------------------|-----------------------|---------------------------|
| Atoms                                                      | O(1)        | O(2)                  | O(3)                  | O(4)                  | O(5)                  | O(6)                  | F(1)        | F(2)                  | F(3)                  | $\Sigma_{\text{cations}}$ |
| Ni(1)                                                      |             | 0.373 <sup>[x2]</sup> | 0.356 <sup>[x2]</sup> | 0.317 <sup>[x2]</sup> |                       |                       |             |                       |                       | <b>2.09</b>               |
| Ni(2)                                                      |             |                       |                       |                       | 0.371 <sup>[x2]</sup> | 0.336 <sup>[x4]</sup> |             |                       |                       | <b>2.09</b>               |
| Al(1)                                                      | 0.569       |                       |                       |                       |                       |                       | 0.427       | 0.537 <sup>[x2]</sup> | 0.527 <sup>[x2]</sup> | <b>3.12</b>               |
| H(1A)                                                      | 0.689       |                       |                       |                       |                       |                       | 0.326       |                       |                       | <b>0.90</b>               |
| H(1B)                                                      | 0.686       |                       |                       |                       |                       |                       | 0.324       |                       |                       | <b>1.01</b>               |
| H(2)                                                       |             | <sup>[x2]</sup> 0.694 |                       |                       |                       |                       |             |                       | 0.164                 | <b>0.86</b>               |
| H(3)                                                       | 0.017       |                       | <sup>[x2]</sup> 0.706 |                       |                       |                       | 0.007       | 0.080                 |                       | <b>0.81</b>               |
| H(4)                                                       | 0.048       |                       |                       | <sup>[x2]</sup> 0.663 |                       |                       | 0.019       |                       |                       | <b>0.73</b>               |
| H(5)                                                       |             |                       |                       |                       | <sup>[x2]</sup> 0.684 |                       |             | 0.160                 |                       | <b>0.84</b>               |
| H(6A)                                                      |             |                       |                       |                       |                       | 0.687                 |             | 0.146                 | 0.168                 | <b>1.00</b>               |
| H(6B)                                                      |             |                       |                       |                       |                       | 0.671                 |             |                       |                       | <b>0.67</b>               |
| $\Sigma_{\text{anions}}$                                   | <b>2.01</b> | <b>1.76</b>           | <b>1.77</b>           | <b>1.64</b>           | <b>1.74</b>           | <b>1.70</b>           | <b>1.10</b> | <b>0.92</b>           | <b>0.86</b>           |                           |

<sup>a</sup> Bond valences sum calculated with the formula:  $S_i = \exp[(R_0 - R_i)/B]$ , where  $S_i$  = valence of bond “ $i$ ”,  $R_0$  is a constant dependent on the bonded elements,  $R_i$  is the bond length of bond  $i$  and  $B=0.37$  or  $0.558$  (H-F only). Left and right superscripts indicate the # of equivalent bonds for anions and cations, respectively.

| <b>FeAlF<sub>5</sub>(H<sub>2</sub>O)<sub>7</sub> at 100K</b> |             |             |                       |                       |                       |                       |                       |                       |             |             |                       |                       |                       |                       |                           |
|--------------------------------------------------------------|-------------|-------------|-----------------------|-----------------------|-----------------------|-----------------------|-----------------------|-----------------------|-------------|-------------|-----------------------|-----------------------|-----------------------|-----------------------|---------------------------|
| Atoms                                                        | O(1)        | O(2)        | O(3)                  | O(4)                  | O(5)                  | O(6)                  | O(7)                  | O(8)                  | F(1)        | F(2)        | F(3)                  | F(4)                  | F(5)                  | F(6)                  | $\Sigma_{\text{cations}}$ |
| Fe(1)                                                        |             |             | 0.349 <sup>[x2]</sup> | 0.352 <sup>[x2]</sup> | 0.317 <sup>[x2]</sup> |                       |                       |                       |             |             |                       |                       |                       |                       | <b>2.04</b>               |
| Fe(2)                                                        |             |             |                       |                       |                       | 0.367 <sup>[x2]</sup> | 0.347 <sup>[x2]</sup> | 0.317 <sup>[x2]</sup> |             |             |                       |                       |                       |                       | <b>2.06</b>               |
| Al(1)                                                        | 0.505       |             |                       |                       |                       |                       |                       |                       | 0.379       |             | 0.546 <sup>[x2]</sup> | 0.512 <sup>[x2]</sup> |                       |                       | <b>3.00</b>               |
| Al(2)                                                        |             | 0.550       |                       |                       |                       |                       |                       |                       |             | 0.413       |                       |                       | 0.510 <sup>[x2]</sup> | 0.490 <sup>[x2]</sup> | <b>2.96</b>               |
| H(1A)                                                        | 0.654       | 0.071       |                       |                       |                       |                       |                       |                       | 0.326       | 0.028       |                       |                       |                       |                       | <b>1.08</b>               |
| H(1B)                                                        | 0.648       |             | 0.018 <sup>[x2]</sup> |                       | 0.015 <sup>[x2]</sup> |                       |                       |                       | 0.324       |             |                       |                       |                       |                       | <b>1.04</b>               |
| H(2A)                                                        |             | 0.647       |                       |                       | 0.063 <sup>[x2]</sup> |                       |                       |                       |             | 0.323       |                       |                       |                       |                       | <b>1.09</b>               |
| H(2B)                                                        | 0.067       | 0.635       |                       |                       |                       |                       |                       |                       | 0.027       | 0.319       |                       |                       |                       |                       | <b>1.05</b>               |
| H(3A)                                                        |             | 0.007       | 0.651                 |                       | 0.016                 |                       |                       |                       |             | 0.003       |                       |                       |                       |                       | <b>0.68</b>               |
| H(3B)                                                        |             |             | 0.635                 |                       |                       |                       |                       |                       |             |             |                       | 0.165                 |                       |                       | <b>0.80</b>               |
| H(4A)                                                        | 0.061       |             |                       | 0.670                 |                       |                       |                       |                       | 0.024       |             |                       |                       |                       |                       | <b>0.76</b>               |
| H(4B)                                                        |             | 0.007       |                       | 0.654                 |                       |                       |                       |                       |             | 0.003       |                       |                       |                       | 0.141                 | <b>0.81</b>               |
| H(5A)                                                        | 0.032       |             |                       |                       | 0.665                 |                       |                       |                       | 0.013       |             |                       |                       |                       |                       | <b>0.71</b>               |
| H(5B)                                                        |             |             |                       |                       | 0.661                 |                       |                       | 0.042                 |             |             |                       |                       |                       |                       | <b>0.70</b>               |
| H(6A)                                                        |             |             |                       |                       |                       | 0.676                 |                       |                       |             |             | 0.164                 |                       |                       |                       | <b>0.84</b>               |
| H(6B)                                                        |             |             |                       |                       |                       | 0.663                 |                       |                       |             |             |                       |                       |                       | 0.149                 | <b>0.81</b>               |
| H(7A)                                                        |             |             |                       |                       |                       |                       | 0.651                 |                       |             |             |                       | 0.166                 |                       |                       | <b>0.82</b>               |
| H(7B)                                                        |             |             |                       |                       |                       |                       | 0.635                 |                       |             |             | 0.157                 |                       |                       |                       | <b>0.79</b>               |
| H(8A)                                                        |             |             |                       |                       |                       |                       |                       | 0.651                 |             |             |                       |                       |                       | 0.124                 | <b>0.78</b>               |
| H(8B)                                                        |             |             |                       |                       |                       |                       |                       | 0.635                 |             |             |                       |                       | 0.175                 |                       | <b>0.81</b>               |
| $\Sigma_{\text{anions}}$                                     | <b>1.97</b> | <b>1.92</b> | <b>1.65</b>           | <b>1.68</b>           | <b>1.74</b>           | <b>1.71</b>           | <b>1.63</b>           | <b>1.65</b>           | <b>1.09</b> | <b>1.09</b> | <b>0.87</b>           | <b>0.84</b>           | <b>0.69</b>           | <b>0.90</b>           |                           |

<sup>a</sup> Bond valences sums calculated with the formula:  $S_i = \exp[(R_0 - R_i)/B]$ , where  $S_i$  = valence of bond “ $i$ ”,  $R_0$  is a constant dependent on the bonded elements,  $R_i$  is the bond length of bond  $i$  and  $B=0.37$  or  $0.558$  (H-F only). Left and right superscripts indicate that the # of equivalent bonds for anions and cations, respectively.

| <b>CoAlF<sub>5</sub>(H<sub>2</sub>O)<sub>7</sub> at 100K</b> |             |             |                       |                       |                       |                       |                       |                       |             |             |                       |                       |                       |                       |                           |
|--------------------------------------------------------------|-------------|-------------|-----------------------|-----------------------|-----------------------|-----------------------|-----------------------|-----------------------|-------------|-------------|-----------------------|-----------------------|-----------------------|-----------------------|---------------------------|
| Atoms                                                        | O(1)        | O(2)        | O(3)                  | O(4)                  | O(5)                  | O(6)                  | O(7)                  | O(8)                  | F(1)        | F(2)        | F(3)                  | F(4)                  | F(5)                  | F(6)                  | $\Sigma_{\text{cations}}$ |
| Co(1)                                                        |             |             | 0.368 <sup>[x2]</sup> | 0.341 <sup>[x2]</sup> | 0.327 <sup>[x2]</sup> |                       |                       |                       |             |             |                       |                       |                       |                       | <b>2.07</b>               |
| Co(2)                                                        |             |             |                       |                       |                       | 0.372 <sup>[x2]</sup> | 0.343 <sup>[x2]</sup> | 0.339 <sup>[x2]</sup> |             |             |                       |                       |                       |                       | <b>2.11</b>               |
| Al(1)                                                        | 0.521       |             |                       |                       |                       |                       |                       |                       | 0.391       |             | 0.536 <sup>[x2]</sup> | 0.519 <sup>[x2]</sup> |                       |                       | <b>3.02</b>               |
| Al(2)                                                        |             | 0.559       |                       |                       |                       |                       |                       |                       |             | 0.420       |                       |                       | 0.514 <sup>[x2]</sup> | 0.499 <sup>[x2]</sup> | <b>3.01</b>               |
| H(1A)                                                        | 0.649       | 0.074       |                       |                       |                       |                       |                       |                       | 0.324       | 0.077       |                       |                       |                       |                       | <b>1.12</b>               |
| H(1B)                                                        | 0.649       |             | 0.018 <sup>[x2]</sup> |                       |                       |                       |                       |                       | 0.324       |             |                       |                       |                       |                       | <b>1.01</b>               |
| H(2A)                                                        |             | 0.649       |                       |                       | 0.060 <sup>[x2]</sup> |                       |                       |                       |             | 0.324       |                       |                       |                       |                       | <b>1.09</b>               |
| H(2B)                                                        | 0.047       | 0.649       |                       |                       |                       |                       |                       |                       | 0.056       | 0.324       |                       |                       |                       |                       | <b>1.08</b>               |
| H(3A)                                                        |             |             | 0.679                 |                       |                       |                       |                       |                       |             |             |                       |                       | 0.165                 |                       | <b>0.84</b>               |
| H(3B)                                                        |             |             | 0.667                 |                       |                       |                       |                       |                       |             |             |                       | 0.169                 |                       |                       | <b>0.84</b>               |
| H(4A)                                                        | 0.028       |             |                       | 0.658                 |                       |                       |                       |                       | 0.064       |             |                       |                       |                       |                       | <b>0.75</b>               |
| H(4B)                                                        |             |             |                       | 0.689                 |                       |                       |                       |                       |             |             |                       |                       |                       | 0.143                 | <b>0.83</b>               |
| H(5A)                                                        | 0.017       |             |                       |                       | 0.683                 |                       |                       |                       | 0.045       |             |                       |                       |                       |                       | <b>0.75</b>               |
| H(5B)                                                        |             |             |                       |                       | 0.711                 |                       | 0.012                 | 0.030                 |             |             |                       |                       |                       |                       | <b>0.75</b>               |
| H(6A)                                                        |             |             |                       |                       |                       | 0.691                 |                       |                       |             |             | 0.168                 |                       |                       |                       | <b>0.86</b>               |
| H(6B)                                                        |             |             |                       |                       |                       | 0.679                 |                       |                       |             |             |                       |                       |                       | 0.153                 | <b>0.84</b>               |
| H(7A)                                                        |             |             |                       |                       |                       |                       | 0.678                 |                       |             |             |                       | 0.163                 |                       |                       | <b>0.84</b>               |
| H(7B)                                                        |             |             |                       |                       |                       |                       | 0.691                 |                       |             |             | 0.151                 |                       |                       |                       | <b>0.84</b>               |
| H(8A)                                                        |             |             |                       |                       |                       |                       |                       | 0.683                 |             |             |                       |                       |                       | 0.142                 | <b>0.83</b>               |
| H(8B)                                                        |             |             |                       |                       |                       |                       |                       | 0.672                 |             |             |                       |                       | 0.172                 |                       | <b>0.84</b>               |
| $\Sigma_{\text{anions}}$                                     | <b>1.91</b> | <b>1.93</b> | <b>1.73</b>           | <b>1.69</b>           | <b>1.78</b>           | <b>1.74</b>           | <b>1.72</b>           | <b>1.72</b>           | <b>1.20</b> | <b>1.15</b> | <b>0.86</b>           | <b>0.85</b>           | <b>0.85</b>           | <b>0.94</b>           |                           |

<sup>a</sup> Bond valences sums calculated with the formula:  $S_i = \exp[(R_0 - R_i)/B]$ , where  $S_i$  = valence of bond “ $i$ ”,  $R_0$  is a constant dependent on the bonded elements,  $R_i$  is the bond length of bond  $i$  and  $B=0.37$  or  $0.558$  (H-F only). Left and right superscripts indicate that the # of equivalent bonds for anions and cations, respectively.

| NiAlF <sub>5</sub> (H <sub>2</sub> O) <sub>7</sub> at 100K |             |             |                       |                       |                       |                       |                       |                       |             |             |                       |                       |                       |                       |                           |
|------------------------------------------------------------|-------------|-------------|-----------------------|-----------------------|-----------------------|-----------------------|-----------------------|-----------------------|-------------|-------------|-----------------------|-----------------------|-----------------------|-----------------------|---------------------------|
| Atoms                                                      | O(1)        | O(2)        | O(3)                  | O(4)                  | O(5)                  | O(6)                  | O(7)                  | O(8)                  | F(1)        | F(2)        | F(3)                  | F(4)                  | F(5)                  | F(6)                  | $\Sigma_{\text{cations}}$ |
| Ni(1)                                                      |             |             | 0.353 <sup>[x2]</sup> | 0.353 <sup>[x2]</sup> | 0.330 <sup>[x2]</sup> |                       |                       |                       |             |             |                       |                       |                       |                       | <b>2.07</b>               |
| Ni(2)                                                      |             |             |                       |                       |                       | 0.378 <sup>[x2]</sup> | 0.338 <sup>[x2]</sup> | 0.336 <sup>[x2]</sup> |             |             |                       |                       |                       |                       | <b>2.10</b>               |
| Al(1)                                                      | 0.533       |             |                       |                       |                       |                       |                       |                       | 0.400       |             | 0.512 <sup>[x2]</sup> | 0.517 <sup>[x2]</sup> |                       |                       | <b>2.99</b>               |
| Al(2)                                                      |             | 0.558       |                       |                       |                       |                       |                       |                       |             | 0.419       |                       |                       | 0.517 <sup>[x2]</sup> | 0.499 <sup>[x2]</sup> | <b>3.01</b>               |
| H(1A)                                                      | 0.668       |             |                       |                       |                       |                       |                       |                       | 0.330       |             |                       |                       |                       |                       | <b>1.00</b>               |
| H(1B)                                                      | 0.651       |             |                       |                       | 0.035 <sup>[x2]</sup> |                       |                       |                       | 0.325       |             |                       |                       |                       |                       | <b>1.05</b>               |
| H(2A)                                                      |             | 0.644       |                       |                       | 0.040 <sup>[x2]</sup> |                       |                       |                       |             | 0.322       |                       |                       |                       |                       | <b>1.05</b>               |
| H(2B)                                                      | 0.074       | 0.644       |                       |                       |                       |                       |                       |                       | 0.078       | 0.322       |                       |                       |                       |                       | <b>1.12</b>               |
| H(3A)                                                      |             | 0.008       | 0.648                 |                       | 0.015                 |                       |                       |                       |             | 0.018       |                       |                       |                       |                       | <b>0.71</b>               |
| H(3B)                                                      |             |             | 0.638                 |                       |                       |                       |                       |                       |             |             |                       | 0.168                 |                       |                       | <b>0.81</b>               |
| H(4A)                                                      | 0.031       |             |                       | 0.659                 |                       |                       |                       |                       | 0.068       |             |                       |                       |                       |                       | <b>0.76</b>               |
| H(4B)                                                      |             |             |                       | 0.649                 |                       |                       |                       |                       |             |             |                       |                       |                       | 0.140                 | <b>0.79</b>               |
| H(5A)                                                      | 0.014       |             |                       |                       | 0.664                 |                       |                       |                       | 0.041       |             |                       |                       |                       |                       | <b>0.72</b>               |
| H(5B)                                                      |             |             |                       |                       | 0.653                 |                       | 0.013                 | 0.036                 |             |             |                       |                       |                       |                       | <b>0.70</b>               |
| H(6A)                                                      |             |             |                       |                       |                       | 0.666                 |                       |                       |             |             | 0.161                 |                       |                       |                       | <b>0.83</b>               |
| H(6B)                                                      |             |             |                       |                       |                       | 0.665                 |                       |                       |             |             |                       |                       |                       | 0.157                 | <b>0.82</b>               |
| H(7A)                                                      |             |             |                       |                       |                       |                       | 0.667                 |                       |             |             |                       | 0.166                 |                       |                       | <b>0.83</b>               |
| H(7B)                                                      |             |             |                       |                       |                       |                       | 0.667                 |                       |             |             | 0.137                 |                       |                       |                       | <b>0.80</b>               |
| H(8A)                                                      |             |             |                       |                       |                       |                       |                       | 0.667                 |             |             |                       |                       |                       | 0.146                 | <b>0.81</b>               |
| H(8B)                                                      |             |             |                       |                       |                       |                       |                       | 0.667                 |             |             |                       |                       | 0.173                 |                       | <b>0.84</b>               |
| $\Sigma_{\text{anions}}$                                   | <b>1.97</b> | <b>1.85</b> | <b>1.64</b>           | <b>1.66</b>           | <b>1.74</b>           | <b>1.71</b>           | <b>1.69</b>           | <b>1.71</b>           | <b>1.24</b> | <b>1.08</b> | <b>0.81</b>           | <b>0.85</b>           | <b>0.69</b>           | <b>0.94</b>           |                           |

<sup>a</sup> Bond valences sums calculated with the formula:  $S_i = \exp[(R_0 - R_i)/B]$ , where  $S_i$  = valence of bond “ $i$ ”,  $R_0$  is a constant dependent on the bonded elements,  $R_i$  is the bond length of bond  $i$  and  $B=0.37$  or  $0.558$  (H-F only). Left and right superscripts indicate that the # of equivalent bonds for anions and cations, respectively.

**Table S4. Out-of-center distortion of octahedral structures in  $[\text{Fe}(\text{H}_2\text{O})_6]^{2+}$  at RT and 100 K temperature.**

|    | Octahedra                                              | Bond distance (Å) |       | Bond difference<br>b/w M-O and M-O' | Cosine (θ)<br>for ∠O-M-O' | Δd |
|----|--------------------------------------------------------|-------------------|-------|-------------------------------------|---------------------------|----|
| RT | [Fe(1)(H <sub>2</sub> O) <sub>6</sub> ] <sup>2+</sup>  | Fe(1)-O(2)        | 2.093 | 0                                   | 1 (for 180°)              | 0  |
|    |                                                        | Fe(1)-O(2)'       | 2.093 |                                     |                           |    |
|    |                                                        | Fe(1)-O(3)        | 2.105 | 0                                   | 1 (for 180°)              |    |
|    |                                                        | Fe(1)-O(3)'       | 2.105 |                                     |                           |    |
|    |                                                        | Fe(1)-O(4)        | 2.126 | 0                                   | 1 (for 180°)              |    |
|    |                                                        | Fe(1)-O(4)'       | 2.126 |                                     |                           |    |
|    | [Fe(2)(H <sub>2</sub> O) <sub>6</sub> ] <sup>2+</sup>  | Fe-O(5)           | 2.087 | 0                                   | 1 (for 180°)              | 0  |
|    |                                                        | Fe-O(5)'          | 2.087 |                                     |                           |    |
|    |                                                        | Fe-O(6)           | 2.123 | 0                                   | 1 (for 180°)              |    |
|    |                                                        | Fe-O(6)'          | 2.123 |                                     |                           |    |
|    |                                                        | Fe-O(6)''         | 2.123 | 0                                   | 1(for 180°)               |    |
|    |                                                        | Fe-O(6)'''        | 2.123 |                                     |                           |    |
|    | [Al(1)F <sub>5</sub> (H <sub>2</sub> O)] <sup>2-</sup> | Al(1)-O(1)/F(1)   | 1.867 | 0                                   | 1(for 180°)               | 0  |
|    |                                                        | Al(1)-O(1)'/F(1)' | 1.867 |                                     |                           |    |
|    |                                                        | Al(1)-F(2)        | 1.784 | 0                                   | 1(for 180°)               |    |
|    |                                                        | Al(1)-F(2)'       | 1.784 |                                     |                           |    |
|    |                                                        | Al(1)-F(3)        | 1.787 | 0                                   | 1(for 180°)               |    |
|    |                                                        | Al(1)-F(3)'       | 1.787 |                                     |                           |    |

|       | Octahedral                                             | Bond distance (Å) |       | Bond difference<br>b/w M-O and M-O' | Cosine (θ)<br>for ∠O-M-O' | Δd |
|-------|--------------------------------------------------------|-------------------|-------|-------------------------------------|---------------------------|----|
| 100 K | [Fe(1)(H <sub>2</sub> O) <sub>6</sub> ] <sup>2+</sup>  | Fe(1)-O(3)        | 2.102 | 0                                   | 1 (for 180°)              | 0  |
|       |                                                        | Fe(1)-O(3)'       | 2.102 |                                     |                           |    |
|       |                                                        | Fe(1)-O(4)        | 2.099 | 0                                   | 1 (for 180°)              |    |
|       |                                                        | Fe(1)-O(4)'       | 2.099 |                                     |                           |    |
|       |                                                        | Fe(1)-O(5)        | 2.138 | 0                                   | 1 (for 180°)              |    |
|       |                                                        | Fe(1)-O(5)'       | 2.138 |                                     |                           |    |
|       | [Fe(2)(H <sub>2</sub> O) <sub>6</sub> ] <sup>2+</sup>  | Fe-O(6)           | 2.084 | 0                                   | 1 (for 180°)              | 0  |
|       |                                                        | Fe-O(6)'          | 2.084 |                                     |                           |    |
|       |                                                        | Fe-O(7)           | 2.105 | 0                                   | 1 (for 180°)              |    |
|       |                                                        | Fe-O(7)'          | 2.105 |                                     |                           |    |
|       |                                                        | Fe-O(8)'          | 2.138 | 0                                   | 1(for 180°)               |    |
|       |                                                        | Fe-O(8)'          | 2.138 |                                     |                           |    |
|       | [Al(1)F <sub>5</sub> (H <sub>2</sub> O)] <sup>2-</sup> | Al(1)-O(1)/F(1)   | 1.904 | 0                                   | 1(for 180°)               | 0  |

|  |                                                        |                   |       |   |             |   |
|--|--------------------------------------------------------|-------------------|-------|---|-------------|---|
|  |                                                        | Al(1)-O(1)/F'(1)' | 1.904 |   |             | 0 |
|  |                                                        | Al(1)-F(3)        | 1.769 | 0 | 1(for 180°) |   |
|  |                                                        | Al(1)-F(3)'       | 1.769 |   |             |   |
|  |                                                        | Al(1)-F(4)        | 1.793 | 0 | 1(for 180°) |   |
|  |                                                        | Al(1)-F(4)'       | 1.793 |   |             |   |
|  | [Al(2)F <sub>5</sub> (H <sub>2</sub> O)] <sup>2-</sup> | Al(1)-O(2)/F(2)   | 1.872 | 0 | 1(for 180°) |   |
|  |                                                        | Al(1)-O(2)/F'(2)' | 1.872 |   |             |   |
|  |                                                        | Al(1)-F(5)        | 1.794 | 0 | 1(for 180°) |   |
|  |                                                        | Al(1)-F(5)'       | 1.794 |   |             |   |
|  |                                                        | Al(1)-F(6)        | 1.809 | 0 | 1(for 180°) |   |
|  |                                                        | Al(1)-F(6)'       | 1.809 |   |             |   |

The out-of-center distortion is defined by  $\Delta_d$  parameter as below.

$$\Delta_d = \frac{|(M-O)-(M-O')|}{|\cos\theta_1|} + \frac{|(M-O)-(M-O')|}{|\cos\theta_2|} + \frac{|(M-O)-(M-O')|}{|\cos\theta_3|}$$

where the oxygen atom pairs (O and O') of six H<sub>2</sub>O molecules which constitute the octahedral is used. The oxygen atoms are located in opposite positions from each other and  $\Theta$  is represented by the angle,  $\angle O-M-O'$ . Two axial positions in the octahedral [AlF<sub>5</sub>(H<sub>2</sub>O)]<sup>2-</sup> is occupied by oxygen and fluorine, respectively, which attributes to the crystallographic disorder for the oxygen and fluorine in [AlF<sub>5</sub>(H<sub>2</sub>O)]<sup>2-</sup>.

As an example,  $\Delta_d$  parameters calculated for FeAlF<sub>5</sub>(H<sub>2</sub>O)<sub>7</sub> at RT and ~100K are depicted in the table above. Other  $\Delta_d$  parameters for CoAlF<sub>5</sub>(H<sub>2</sub>O)<sub>7</sub> and NiAlF<sub>5</sub>(H<sub>2</sub>O)<sub>7</sub> are also shown as zero values, respectively. It means that the tilting and distortion of octahedral structures does NOT exist in [M(H<sub>2</sub>O)<sub>6</sub>]<sup>2+</sup> ( $M^{2+} = Fe^{2+}$ ,  $Co^{2+}$ , or  $Ni^{2+}$ ) and [AlF<sub>5</sub>(H<sub>2</sub>O)]<sup>2-</sup>.



**Figure S1. Experimental and Calculated X-ray powder diffraction patterns for  $M^{2+}\text{AlF}_5(\text{H}_2\text{O})_7$  ( $M^{2+} = \text{Fe}^{2+}$ ,  $\text{Co}^{2+}$ , or  $\text{Ni}^{2+}$ ): (a)  $\text{FeAlF}_5(\text{H}_2\text{O})_7$ , (b)  $\text{CoAlF}_5(\text{H}_2\text{O})_7$  and (c)  $\text{NiAlF}_5(\text{H}_2\text{O})_7$ .**

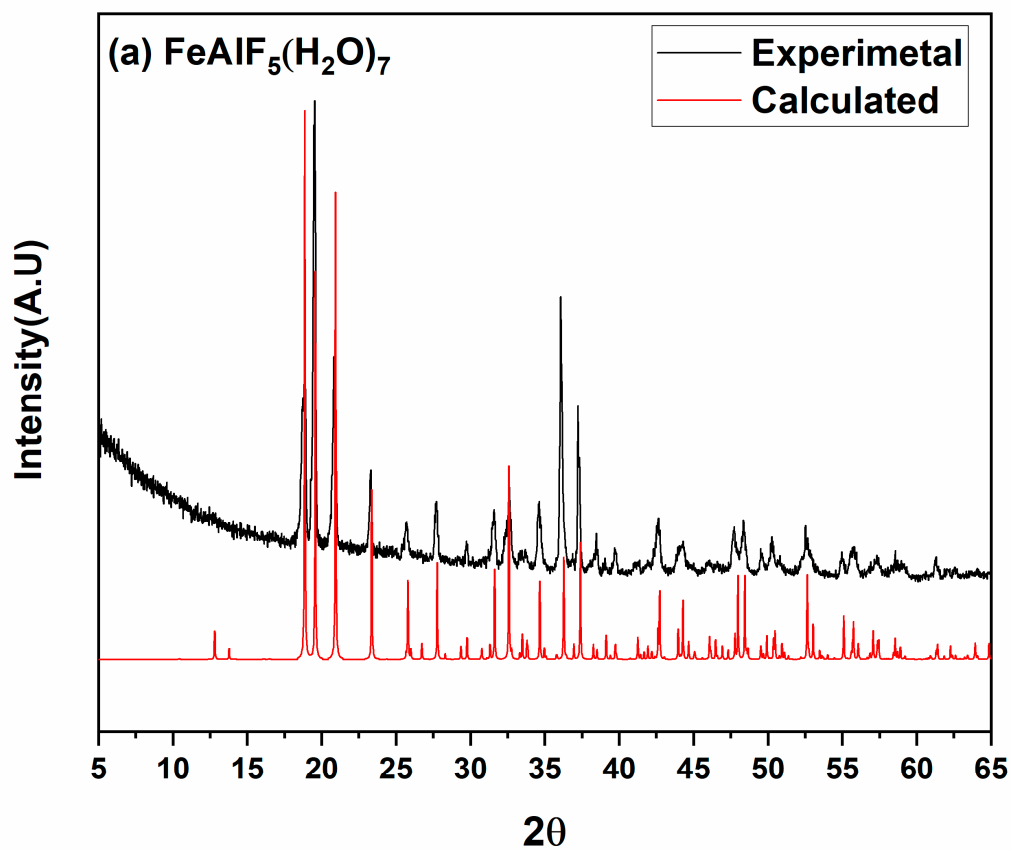

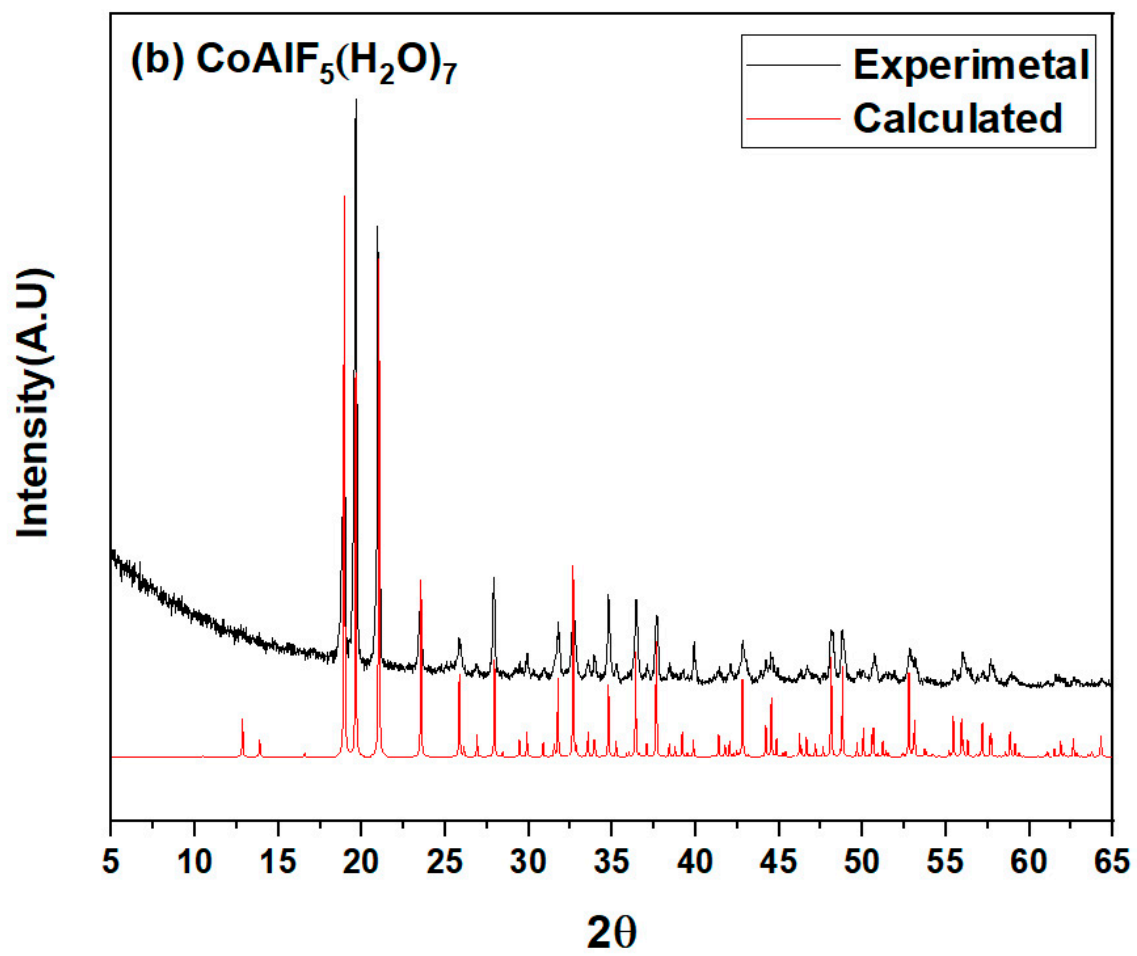

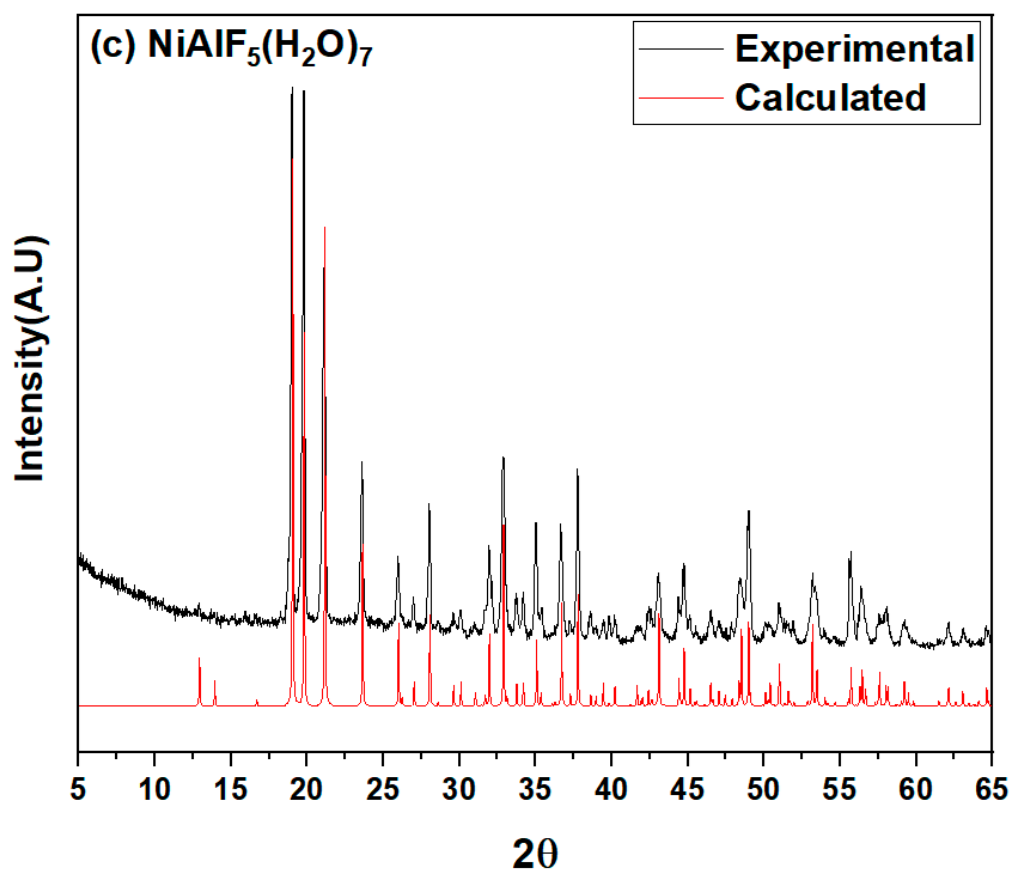

Figure S2. ORTEP representation (50% probability ellipsoid) for  $M^{2+}\text{AlF}_5(\text{H}_2\text{O})_7$  ( $M^{2+} = \text{Fe}^{2+}$ ,  $\text{Co}^{2+}$ , or  $\text{Ni}^{2+}$ ).

**FeAlF<sub>5</sub>(H<sub>2</sub>O)<sub>7</sub>**  
**C2/m (No. 12), 300 K**

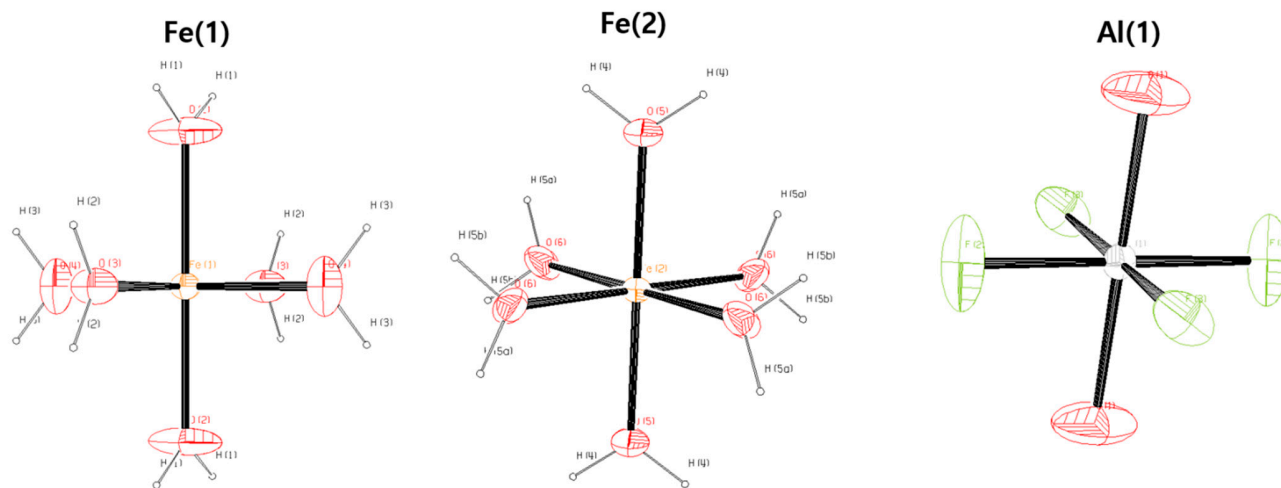

(Hydrogen atoms bonded to disordered O/F sites were excluded to enhance clarity)

**FeAlF<sub>5</sub>(H<sub>2</sub>O)<sub>7</sub>**  
**P-1 (No. 2), 100 K**

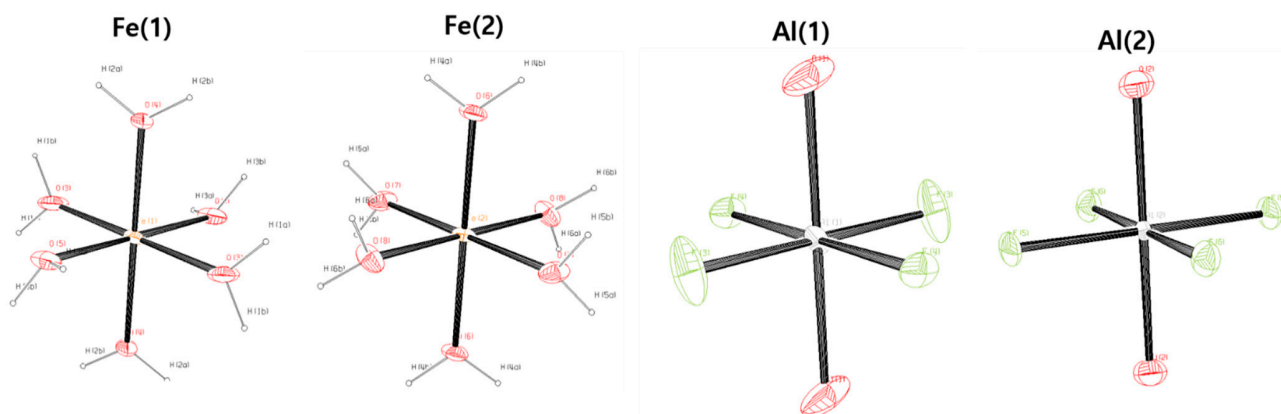

(Hydrogen atoms bonded to disordered O/F sites were excluded to enhance clarity)

**CoAlF<sub>5</sub>(H<sub>2</sub>O)<sub>7</sub>**  
**C2/m (No. 12), 300 K**

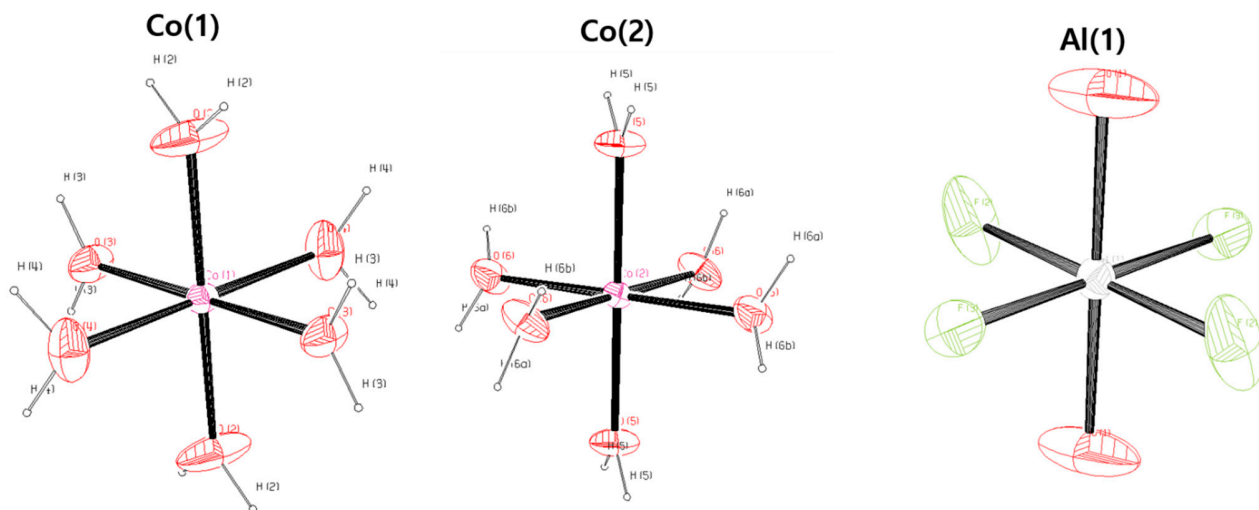

(Hydrogen atoms bonded to disordered O/F sites were excluded to enhance clarity)

**CoAlF<sub>5</sub>(H<sub>2</sub>O)<sub>7</sub>**  
**P-1 (No. 2), 100 K**

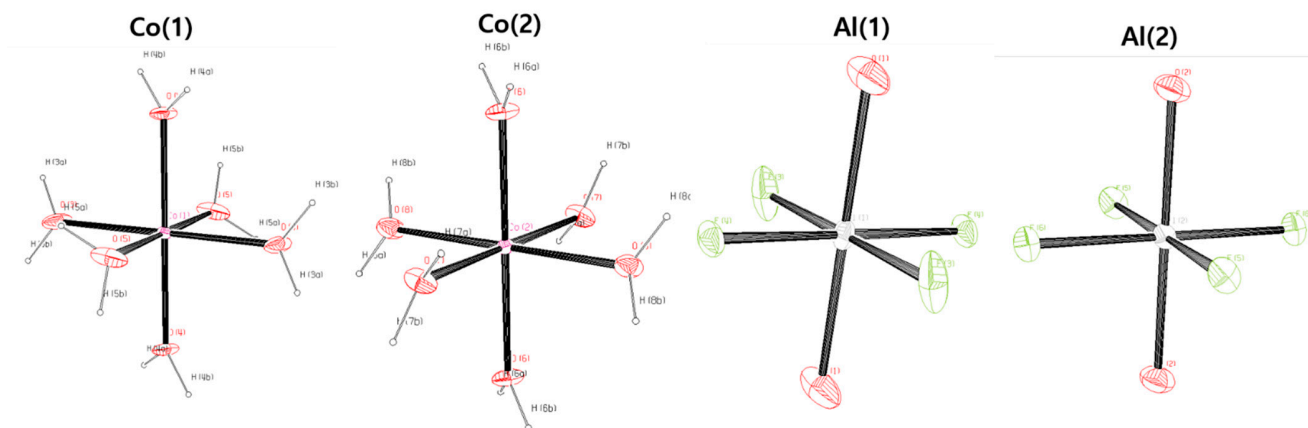

(Hydrogen atoms bonded to disordered O/F sites were excluded to enhance clarity)

**NiAlF<sub>5</sub>(H<sub>2</sub>O)<sub>7</sub>**  
**C2/m (No. 12), 300 K**

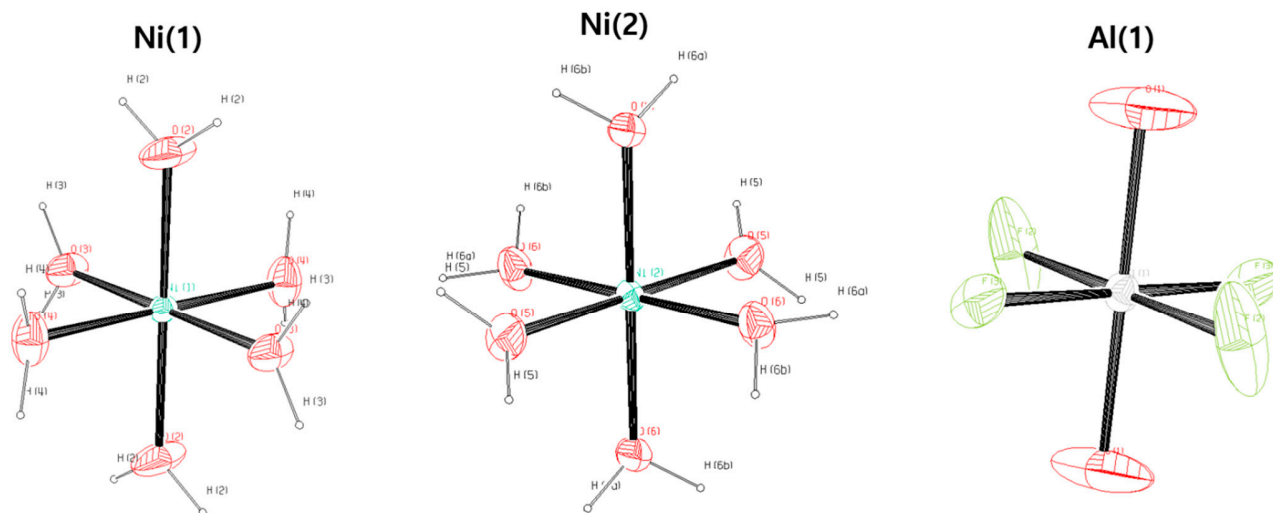

(Hydrogen atoms bonded to disordered O/F sites were excluded to enhance clarity)

**NiAlF<sub>5</sub>(H<sub>2</sub>O)<sub>7</sub>**  
**P-1 (No. 2), 100 K**

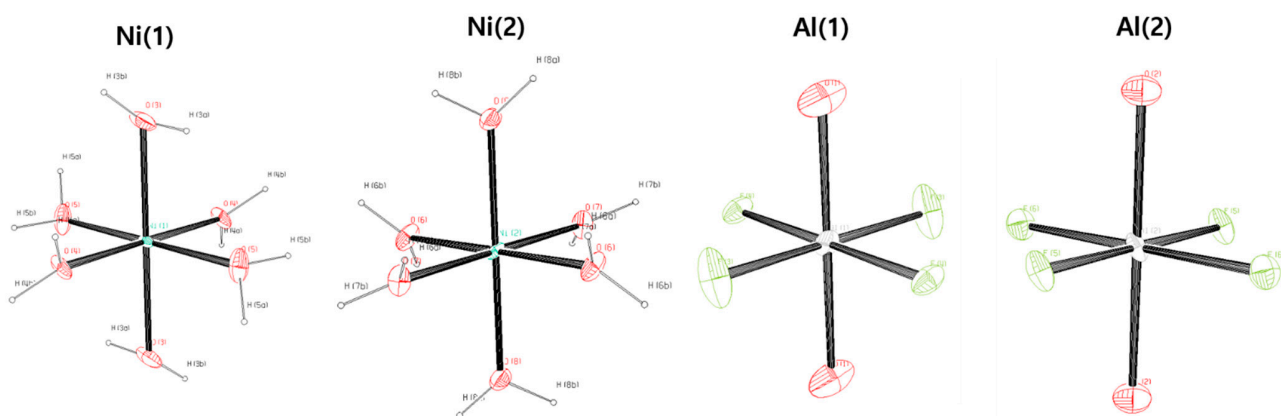

(Hydrogen atoms bonded to disordered O/F sites were excluded to enhance clarity)

**Figure S3. FT-IR Spectra of  $M^{2+}\text{AlF}_5(\text{H}_2\text{O})_7$  ( $M^{2+} = \text{Fe}^{2+}$ ,  $\text{Co}^{2+}$ , or  $\text{Ni}^{2+}$ ): (a)  $\text{FeAlF}_5(\text{H}_2\text{O})_7$ , (b)  $\text{CoAlF}_5(\text{H}_2\text{O})_7$  and (c)  $\text{NiAlF}_5(\text{H}_2\text{O})_7$ .**

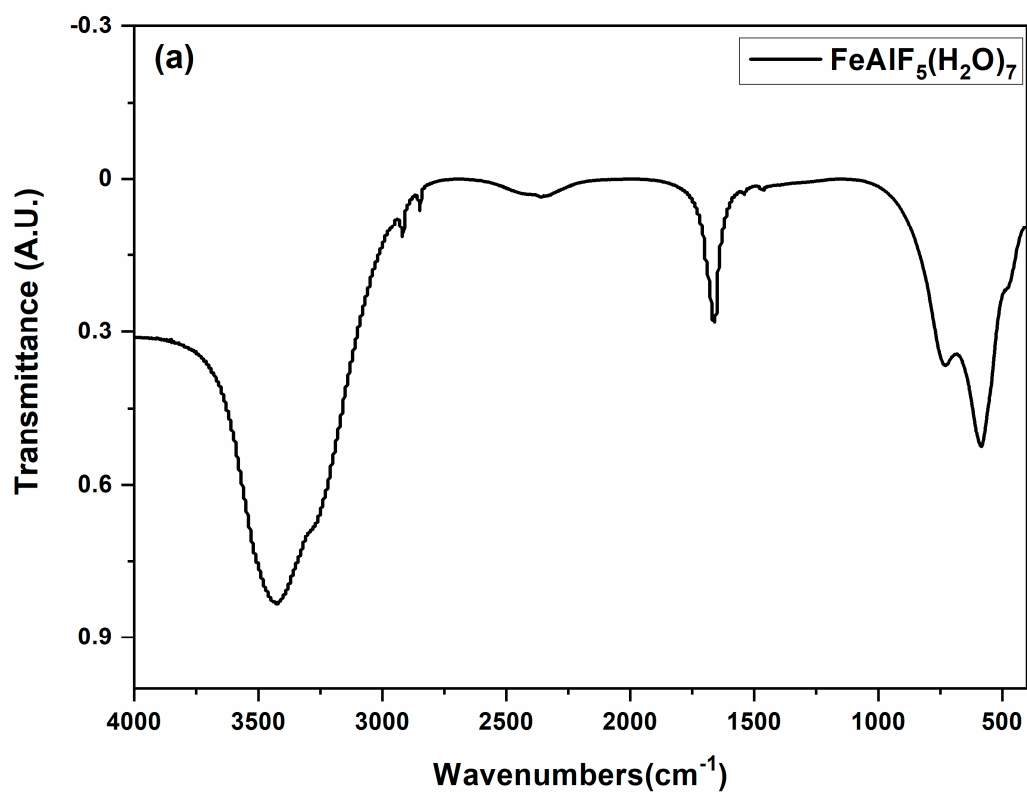

| $\text{FeAlF}_5(\text{H}_2\text{O})_7$ |                        |                    |                                            |
|----------------------------------------|------------------------|--------------------|--------------------------------------------|
| $\nu(\text{O-H})$                      | $\delta(\text{H-O-H})$ | $\nu(\text{Fe-O})$ | $\nu(\text{Al-F})$ or $\nu(\text{Al-O/F})$ |
| 3430                                   | 1660                   | 580                | 730                                        |
|                                        |                        | 465                |                                            |

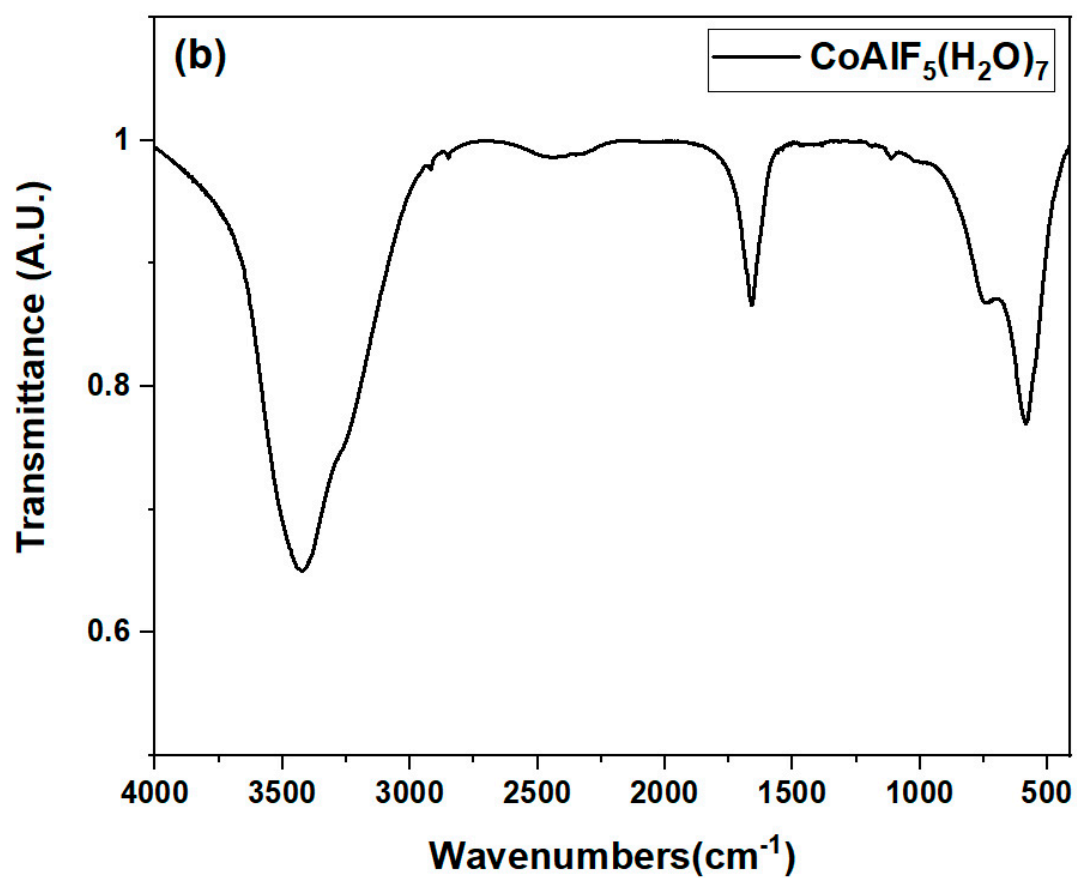

| $\text{CoAlF}_5(\text{H}_2\text{O})_7$ |                        |                    |                                            |
|----------------------------------------|------------------------|--------------------|--------------------------------------------|
| $\nu(\text{O-H})$                      | $\delta(\text{H-O-H})$ | $\nu(\text{Co-O})$ | $\nu(\text{Al-F})$ or $\nu(\text{Al-O/F})$ |
| 3260                                   | 1660                   | 583                | 750                                        |
|                                        |                        |                    |                                            |



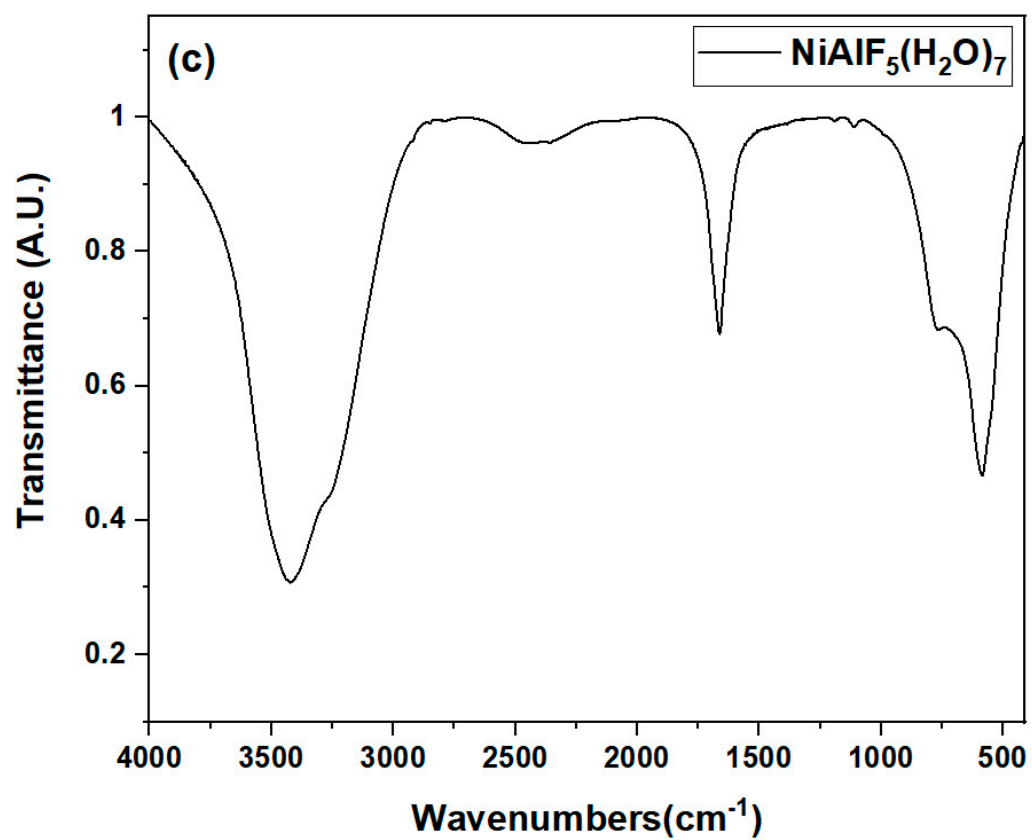

| $\text{NiAlF}_5(\text{H}_2\text{O})_7$ |                        |                    |                                            |
|----------------------------------------|------------------------|--------------------|--------------------------------------------|
| $\nu(\text{O-H})$                      | $\delta(\text{H-O-H})$ | $\nu(\text{Ni-O})$ | $\nu(\text{Al-F})$ or $\nu(\text{Al-O/F})$ |
| 3260                                   | 1650                   | 580                | 770                                        |
|                                        |                        |                    |                                            |

Figure S4. Powder X-ray diffraction pattern for final residuals after TGA experiment: (a)  $\text{FeAlF}_5(\text{H}_2\text{O})_7$ , (b)  $\text{CoAlF}_5(\text{H}_2\text{O})_7$  and (c)  $\text{NiAlF}_5(\text{H}_2\text{O})_7$ .

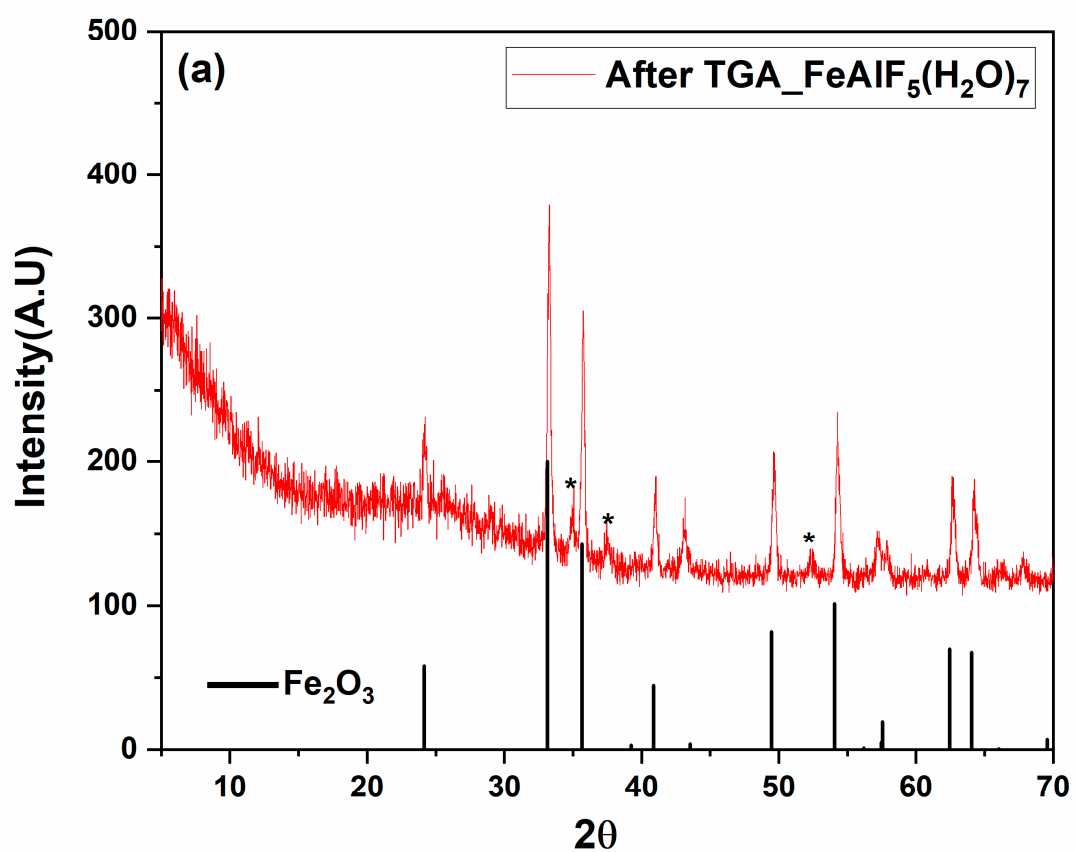

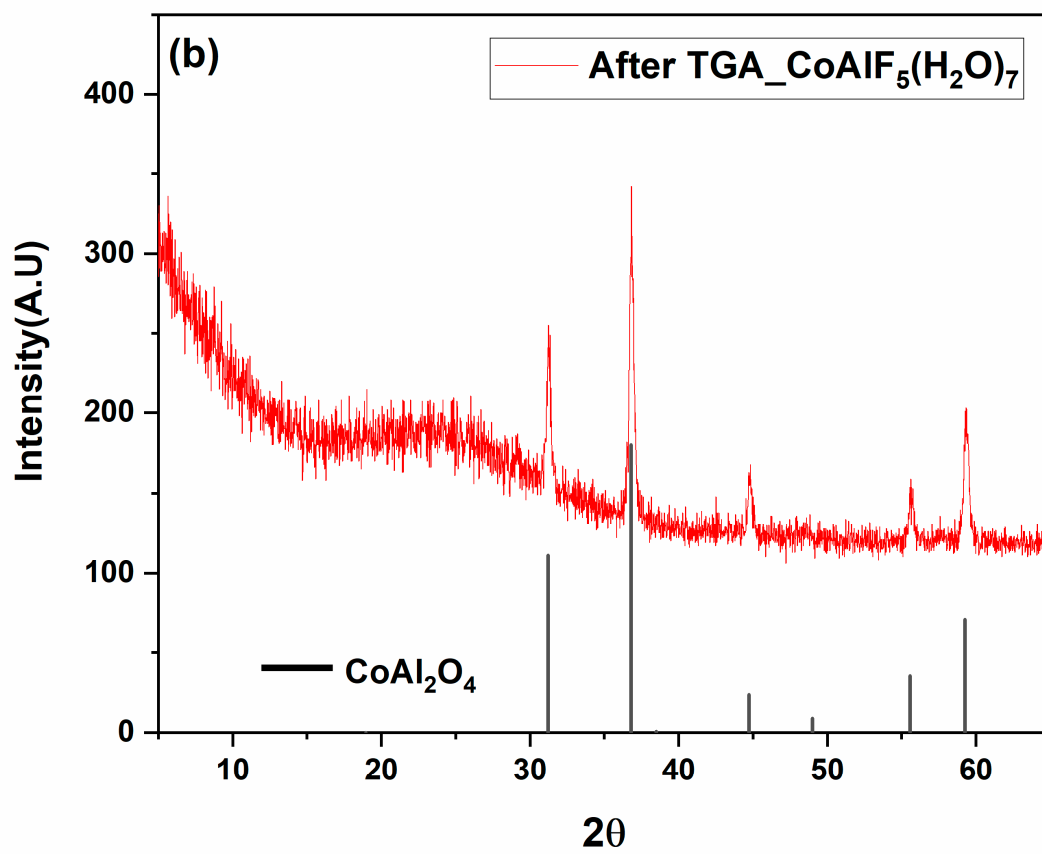

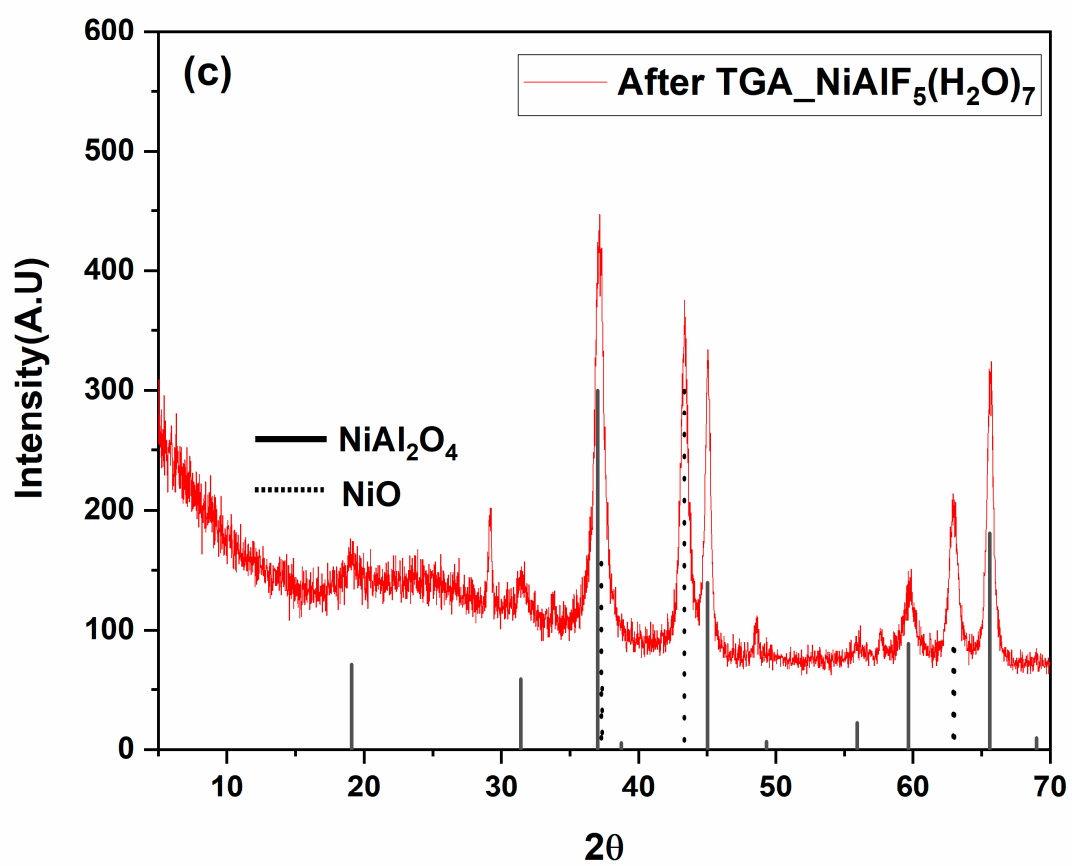

Supplement: s1 [file s1]
